# Supplementary material for: Uniform distribution of graphene oxide sheets into a poly-vinylidene fluoride nanoparticle matrix through shear-driven aggregation
Source: Royal Society of Chemistry journal article supplement (doi:10.1039/c6sm00551a), 2016-01-01
Supplement: c6sm00551a1.pdf [file c6sm00551a1.pdf]

**Electronic supporting information**  
for  
**Uniform distribution of graphene oxide sheets into poly-  
vinylidene fluoride nanoparticle matrix through shear-  
driven aggregation**

Xinxin Sheng<sup>a,b</sup>, Delong Xie<sup>a</sup>, Xinya Zhang<sup>b</sup>, Li Zhong<sup>b</sup>, Hua Wu<sup>a\*</sup>, and Massimo Morbidelli<sup>a\*</sup>

a. Institute for Chemical and Bioengineering, Department of Chemistry and Applied Biosciences,  
ETH Zurich, 8093 Zurich, Switzerland

b. School of Chemistry and Chemical Engineering, South China University of Technology,  
510640, Guangzhou, Guangdong, China

**Synthesis of Graphite Oxide**

In a typical procedure, 5.0 g graphite powder, 5.0 g sodium nitrate (NaNO<sub>3</sub>) and 250 mL of concentrated sulfuric acid (H<sub>2</sub>SO<sub>4</sub>) were mixed and stirred for 20 min in a 2000 mL round flask in an ice bath. Then, 30 g of KMnO<sub>4</sub> was slowly added into the flask in 30 min in the ice bath. The mixture was stirred continuously for 48 h, after which 460 mL of water was added dropwise into the suspension within 30 min under stirring. The suspension was further treated with 420 mL of warm water (50~60 °C) and 100 mL of H<sub>2</sub>O<sub>2</sub> (30%) to reduce residual KMnO<sub>4</sub> and MnO<sub>2</sub> to

soluble manganese sulfate. The mixture was centrifuged and washed with a solution of 6 wt%  $\text{H}_2\text{SO}_4$ /1 wt%  $\text{H}_2\text{O}_2$  to further remove residual metal oxides. Then the product was washed with water several times, dialyzed for one week and the graphite oxide sample was obtained after freeze-drying for two days.

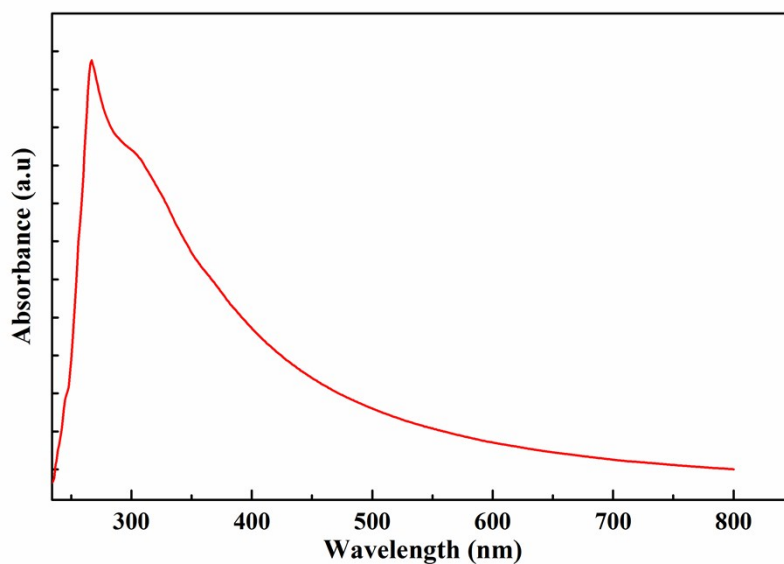

**Fig. S1** UV-vis absorption spectra of exfoliated graphene oxide (GO) sheets dispersed in DMF.
